# Supplementary material
Source: PubMed Central journal article supplement (PMC5814986)
Supplement: jamacardiol-2-561-s001.pdf [file jamacardiol-2-561-s001.pdf]

## Supplementary Online Content

Marzec LN, Peterson PN, Bao H, et al. Use of cardiac resynchronization therapy among eligible patients receiving an implantable cardioverter defibrillator: insights from the National Cardiovascular Data Registry Implantable Cardioverter Defibrillator Registry. *JAMA Cardiol.* doi:10.1001/jamacardio.2016.5388

**eTable.** Patient Criteria Based on Strength of Guideline Recommendation for CRT.

This supplementary material has been provided by the authors to give readers additional information about their work.

**eTable.** Patient Criteria Based on Strength of Guideline Recommendation for CRT

|                            |                                                                                                              |
|----------------------------|--------------------------------------------------------------------------------------------------------------|
| <b>2008 Guidelines</b>     | <b>Patients implanted between April 1, 2010 and August 31, 2012</b>                                          |
| <b>Class I</b>             | LVEF $\leq$ 35%, QRS duration $\geq$ 0.12 seconds, sinus rhythm, NYHA III or ambulatory IV                   |
| <b>Class IIa</b>           | LVEF $\leq$ 35%, QRS duration $\geq$ 0.12 seconds, atrial fibrillation, NYHA III or ambulatory IV            |
|                            |                                                                                                              |
| <b>2012 Focused Update</b> | <b>Patients implanted between September 1, 2012 and June 30, 2014</b>                                        |
| <b>Class I</b>             | LVEF $\leq$ 35%, LBBB, QRS duration $\geq$ 0.15 seconds, sinus rhythm, NYHA II, III, or ambulatory IV        |
| <b>Class IIa</b>           | LVEF $\leq$ 35%, LBBB, QRS duration 0.12-0.149 seconds, sinus rhythm, NYHA II, III, or ambulatory IV         |
|                            | LVEF $\leq$ 35%, non-LBBB, QRS duration $\geq$ 0.15 seconds, sinus rhythm, NYHA III or ambulatory IV         |
|                            | LVEF $\leq$ 35%, atrial fibrillation, LBBB, QRS duration $\geq$ 0.15 seconds, NYHA II, III, or ambulatory IV |

Abbreviations: LVEF, left ventricular ejection fraction; NYHA, New York Heart Association; LBBB, left bundle branch block
